# Supplementary material
Source: MDPI journal article supplement (https://www.mdpi.com/2072-4292/15/3/824)
Supplement: s1 [file s1 › remotesensing-2142866-supplementary.pdf]

## Supplementary Materials:

**Table S1.** Traditional vegetation indices from past investigations.

| Vegetation indices                                                                                                                                                                                                                                                                                                                                  | Formula                                                                                                | Reference |
|-----------------------------------------------------------------------------------------------------------------------------------------------------------------------------------------------------------------------------------------------------------------------------------------------------------------------------------------------------|--------------------------------------------------------------------------------------------------------|-----------|
| <b>Visible spectral vegetation indices</b>                                                                                                                                                                                                                                                                                                          |                                                                                                        |           |
| Normalized Green Red Difference Index (NGDRI)                                                                                                                                                                                                                                                                                                       | $(B3-B4)/(B3+B4)$                                                                                      | 62        |
| Red Green Blue Vegetation Index (RGBVI)                                                                                                                                                                                                                                                                                                             | $[B32-(B2 \times B4)]/[B32+(B2 \times B4)]$                                                            | 63        |
| Excess green index (ExG)                                                                                                                                                                                                                                                                                                                            | $2 \times B3 - B4 - B2$                                                                                | 64        |
| Plant Pigment Ratio (PPR)                                                                                                                                                                                                                                                                                                                           | $(B3-B2)/(B3+B2)$                                                                                      | 65        |
| Visible Atmospheric Resistance Index (VARI)                                                                                                                                                                                                                                                                                                         | $(B3-B4)/(B3+B4-B2)$                                                                                   | 66        |
| Normalized Red Blue Index (NRBI)                                                                                                                                                                                                                                                                                                                    | $(B4-B2)/(B4+B2)$                                                                                      | 67        |
| Triangular greenness index (TGI)                                                                                                                                                                                                                                                                                                                    | $-0.5 \times [(\lambda B4 - \lambda B) \times (B4 - B3) - (\lambda B4 - \lambda B3) \times (B4 - B2)]$ | 69        |
| <b>Near infrared vegetation indices</b>                                                                                                                                                                                                                                                                                                             |                                                                                                        |           |
| Normalized Difference Vegetation Index (NDVI)                                                                                                                                                                                                                                                                                                       | $(B8-B4)/(B8+B4)$                                                                                      | 69        |
| Ratio simple vegetation index 1 (RV1)                                                                                                                                                                                                                                                                                                               | $B8/B4$                                                                                                | 70        |
| Difference Vegetation Index (DVI)                                                                                                                                                                                                                                                                                                                   | $B8-B4$                                                                                                | 62        |
| Green Difference Vegetation Index (GDVI)                                                                                                                                                                                                                                                                                                            | $B8-B3$                                                                                                | 62        |
| Soil-adjusted vegetation index (SAVI)                                                                                                                                                                                                                                                                                                               | $(B8-B4)/(B8+B4+L) \times (1+0.5)$                                                                     | 71        |
| Green normalized difference vegetation index (GNDVI)                                                                                                                                                                                                                                                                                                | $(B8-B3)/(B8+B3)$                                                                                      | 72        |
| Optimized SAVI (OSAVI)                                                                                                                                                                                                                                                                                                                              | $(B8-B4)/(B8+B4+0.16) \times (1+0.16)$                                                                 | 73        |
| Modified SAVI (MSAVI)                                                                                                                                                                                                                                                                                                                               | $0.5 \times \{2 \times B8 + 1 - \sqrt{[(2 \times B8 + 1)^2 - 8 \times (B8 - B4)]}\}$                   | 74        |
| Normalized Difference Water Index (NDWI)                                                                                                                                                                                                                                                                                                            | $(B8-B11)/(B8+B11)$                                                                                    | 75        |
| <b>Red-edge vegetation indices</b>                                                                                                                                                                                                                                                                                                                  |                                                                                                        |           |
| Normalized Difference Red-edge Index (NDRE)                                                                                                                                                                                                                                                                                                         | $(B8-B5)/(B8+B5)$                                                                                      | 72        |
| Canopy Chlorophyll Content Index (CCCI)                                                                                                                                                                                                                                                                                                             | $(NDRE - c0NDVI)/(c1NDVI - c0NDVI)$                                                                    | 18        |
| Simplified CCCI (SCCCI)                                                                                                                                                                                                                                                                                                                             | $(NDVI/NDRE)$                                                                                          | 76        |
| MERIS Terrestrial Chlorophyll Index (MTCI)                                                                                                                                                                                                                                                                                                          | $(B6-B5)/(B5-B4)$                                                                                      | 77        |
| Ratio Simple Ratio Vegetation Index 2 (RV12)                                                                                                                                                                                                                                                                                                        | $B6/B5$                                                                                                | 78        |
| Modified NDVI (MNDVI)*.                                                                                                                                                                                                                                                                                                                             | $(B7-B6)/(B7+B6)$                                                                                      | 78        |
| Triangular core red-edge vegetation index (RETVI)                                                                                                                                                                                                                                                                                                   | $100 \times (B8-B5) - 10 \times (B8-B3)$                                                               | 17        |
| Simple ratio red-edge (SRRE)                                                                                                                                                                                                                                                                                                                        | $B8/B5$                                                                                                | 70        |
| Red-edge normalized vegetation index (RERNDVI)                                                                                                                                                                                                                                                                                                      | $(B8-B4)/(B8+B4) \times \sqrt{B6/B5}$                                                                  | 79        |
| Red-edge position (REP)                                                                                                                                                                                                                                                                                                                             | $\lambda B5 - (\lambda B6 - \lambda B5) \times [(B4+B7)/2 - B5] / (B6-B5)$                             | 80        |
| Chlorophyll absorption transformed reflectance index (TCARI)                                                                                                                                                                                                                                                                                        | $3 \times [(B5-B4) - 0.2 \times (B4E-B3) \times (B5/B4)]$                                              | 81        |
| Canopy Double Peak Nitrogen Index (DCNI)                                                                                                                                                                                                                                                                                                            | $(B6-B5)/(B5-B4)/(B6-B4+0.03)$                                                                         | 82        |
| Chlorophyll absorption modified into reflectance index (MCARI)                                                                                                                                                                                                                                                                                      | $[B5-B4] - 0.2 \times (B5-B3) \times (B5/B4)$                                                          | 83        |
| The nomenclature of the spectral bands was B2 (blue, 492 nm), B3 (green, 559 nm), B4 (red ), B5 (red-edge 1, 704 nm), B6 (red-edge 2, 740 nm), B7 (red-edge 3, 780 nm), B8 (near infrared 833 nm), B11 (short-wave infrared spectral range 1, 1375 nm) and B12 (short-wave infrared spectral range 2, 1612 nm). The $\lambda$ were expressed in nm. |                                                                                                        |           |

```

if(i!=j & i!=k & j!=k){ #Filter for i, j and k to be different
#=====VI_1-14 are individual vegetation indices=====
a <- M[,i]; b <- M[,j]; c <- M[,k] #assignment of a, b and c as the selected columns of matrix M
VII1 <- a-b; VII2 <- a/b;
VII3 <- (a-b)/(a+b)
VII4 <- (a-b)/(a+b+0.25)*1.25
VII5 <- (a-b)/(a+b+0.5)*1.5
VII6 <- (a-b)/(a+b+0.75)*1.75
VII7 <- (2*a+1-(sqrt((2*a+1)^2-8*(a-b))))/2
VII8 <- (a-b)/(a+b-c)
VII9 <- ((a)^2-(b*c))/((a)^2+(b*c))
VII10 <- 100*(a-b)-10*(a-c)
VII11 <- ((a-b)-0.2*(a-c))*(a/b)
VII12 <- (a-b)*(b-c)/(a-c+0.03)
VII13 <- (a-b)/(a+b)/(a-c)/(a+c)
VII14 <- 2.5*(a-b)/((a+6*b-7.5*c)+1)

#=====VII_1-14 are dVIsor vegetation indices=====
dVIsor <- c(sample(firstband:n,3,replace = FALSE)); i2<-divisor[i1]; j2<-divisor[2]; k2<-divisor[3]
aa <- M[,i2]; bb <- M[,j2]; cc <- M[,k2] #assignment of aa, bb and cc as the selected columns of M
VII1 <- aa-bb
VII2 <- aa/bb
VII3 <- (aa-bb)/(aa+bb)
VII4 <- (aa-bb)/(aa+bb+0.25)*1.25
VII5 <- (aa-bb)/(aa+bb+0.5)*1.5
VII6 <- (aa-bb)/(aa+bb+0.75)*1.75
VII7 <- (2*aa+1-(sqrt((2*aa+1)^2-8*(aa-bb))))/2
VII8 <- (aa-bb)/(aa+bb-cc)
VII9 <- ((aa)^2-(bb*cc))/((aa)^2+(bb*cc))
VII10 <- 100*(aa-bb)-10*(aa-cc)
VII11 <- ((aa-bb)-0.2*(aa-cc))*(aa/bb)
VII12 <- (aa-bb)*(bb-cc)/(aa-cc+0.03)
VII13 <- (aa-bb)/(aa+bb)/(aa-cc)/(aa+cc)
VII14 <- 2.5*(aa-bb)/((aa+6*bb-7.5*cc)+1)

#=====C are the combined vegetation indices (e.g. C89 = VII8/VII9)=====
C12<-VII1/VII2;C13<-VII1/VII3;C14<-VII1/VII4;C15<-VII1/VII5;C16<-VII1/VII6;C17<-VII1/VII7;C18<-VII1/VII8
C19<-VII1/VII9;C110<-VII1/VII10;C111<-VII1/VII11;C112<-VII1/VII12;C113<-VII1/VII13;C114<-VII1/VII14
C23<-VII2/VII3;C24<-VII2/VII4;C25<-VII2/VII5;C26<-VII2/VII6;C27<-VII2/VII7;C28<-VII2/VII8;C29<-VII2/VII9
C210<-VII2/VII10;C211<-VII2/VII11;C212<-VII2/VII12;C213<-VII2/VII13;C214<-VII2/VII14
C34<-VII3/VII4;C35<-VII3/VII5;C36<-VII3/VII6;C37<-VII3/VII7;C38<-VII3/VII8;C39<-VII3/VII9;C310<-VII3/VII10
C311<-VII3/VII11;C312<-VII3/VII12;C313<-VII3/VII13;C314<-VII3/VII14
C45<-VII4/VII5;C46<-VII4/VII6;C47<-VII4/VII7;C48<-VII4/VII8;C49<-VII4/VII9;C410<-VII4/VII10;C411<-VII4/VII11
C412<-VII4/VII12;C413<-VII4/VII13;C414<-VII4/VII14
C56<-VII5/VII6;C57<-VII5/VII7;C58<-VII5/VII8;C59<-VII5/VII9;C510<-VII5/VII10;C511<-VII5/VII11
C512<-VII5/VII12;C513<-VII5/VII13;C514<-VII5/VII14
C67<-VII6/VII7;C68<-VII6/VII8;C69<-VII6/VII9;C610<-VII6/VII10;C611<-VII6/VII11;C612<-VII6/VII12
C613<-VII6/VII13;C614<-VII6/VII14
C78<-VII7/VII8;C79<-VII7/VII9;C710<-VII7/VII10;C711<-VII7/VII11;C712<-VII7/VII12;C713<-VII7/VII13;C714<-VII7/VII14
C89<-VII8/VII9;C810<-VII8/VII10;C811<-VII8/VII11;C812<-VII8/VII12;C813<-VII8/VII13;C814<-VII8/VII14
C910<-VII9/VII10;C911<-VII9/VII11;C912<-VII9/VII12;C913<-VII9/VII13;C914<-VII9/VII14
C1011<-VII10/VII11;C1012<-VII10/VII12;C1013<-VII10/VII13;C1014<-VII10/VII14
C1112<-VII11/VII12;C1113<-VII11/VII13;C1114<-VII11/VII14
C1213<-VII12/VII13;C1214<-VII12/VII14
C1314<-VII13/VII14

#=====Vis contains the matrix M and the vegetation indices=====
Vis <- cbind(M,I1,I2,I3,I4,I5,I6,I7,I8,I9,I10,I11,I12,I13,I14,C12,C13,C14,C15,C16,C17,C18,C19,C110,C111,
C112,C113,C114,C23,C24,C25,C26,C27,C28,C29,C210,C211,C212,C213,C214,C34,C35,C36,C37,C38,C39,C310,
C311,C312,C313,C314,C45,C46,C47,C48,C49,C410,C411,C412,C413,C414,C56,C57,C58,C59,C510,C511,C512,
C513,C514,C67,C68,C69,C610,C611,C612,C613,C614,C78,C79,C710,C711,C712,C713,C714,C89,C810,C811,C812,
C813,C814,C910,C911,C912,C913,C914,C1011,C1012,C1013,C1014,C1112,C1113,C1114,C1213,C1214,C1314)

```

**Figure S1.** Calculate individual (VI<sub>1-14</sub>) and combined (C<sub>12-1314</sub>) vegetation indices during one iteration using R software. The example for the individual VIs and its divisors for combined indexes (C<sub>8/9-14</sub>) is marked in yellow background.

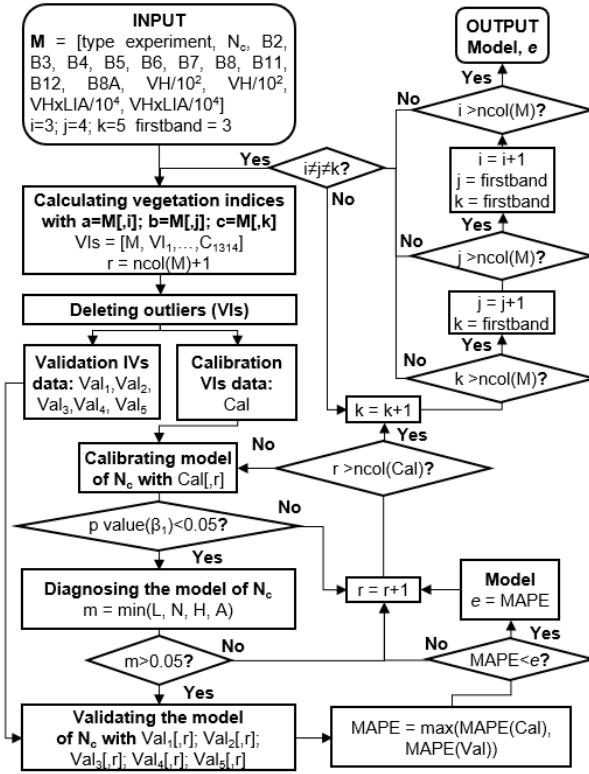

**Figure S2.** Conceptualization of the iteration function diagram (loop) used to generate, evaluate and select regression models with vegetation indices. IVs correspond to the vegetation indices in Figure S1;  $ncol(M)$  is a function of the R software to calculate the number of columns in a matrix. The letters L, N, H, and A are the p-values of the linearity ("RESET"), normality ("Kolmogorov-Smirnov"), homoscedasticity ("Breusch-Pagan"), and autocorrelation ("Durbin-Watson") tests, respectively.
